# Supplementary material for: Long-Term Stability of Blood Serum Biomarkers in Traumatic Brain Injury: A Feasibility Study
Source: Frontiers journal article supplement (doi:10.3389/fneur.2022.877050), 2022-05-18
Supplement: Data_Sheet_1.PDF [file Data_Sheet_1.PDF]

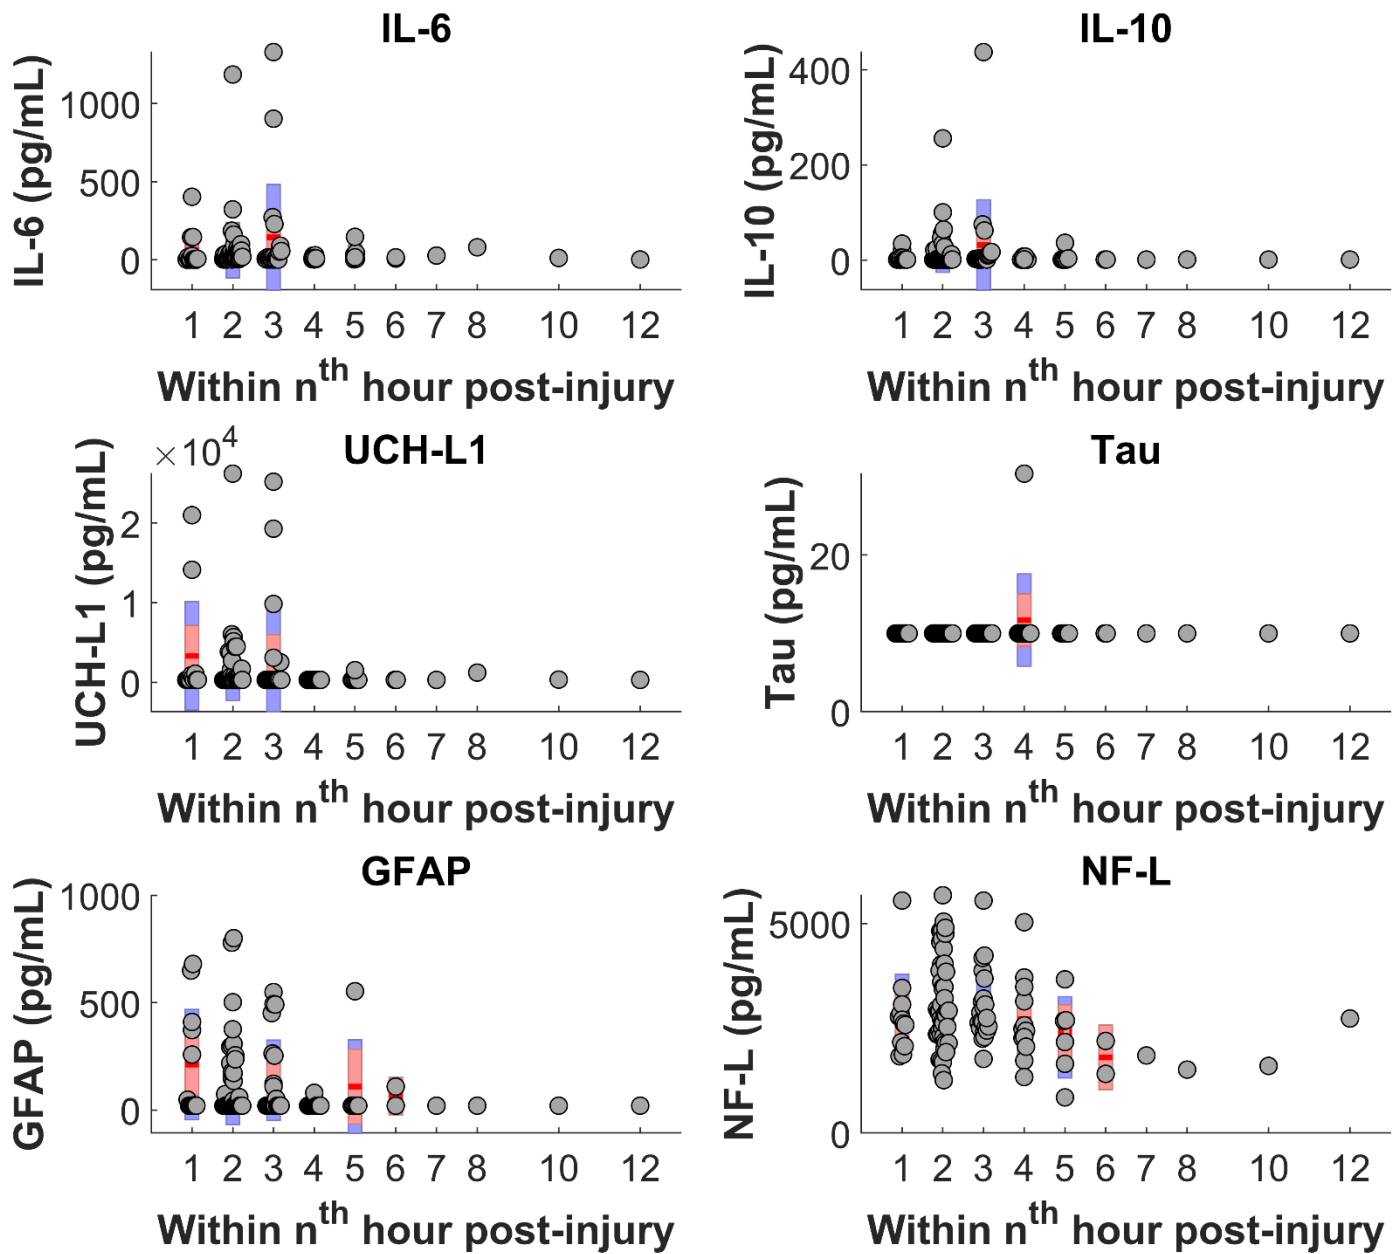

**Supplementary Figure 1.** Biomarkers levels related to interval injury-to-blood-sampling.
